# Supplementary material for: Construction of supramolecular polymer hydrogel electrolyte with ionic channels for flexible supercapacitors
Source: Royal Society of Chemistry journal article supplement (doi:10.1039/d1qm00396h), 2021-01-01
Supplement: d1qm00396h1.pdf [file d1qm00396h1.pdf]

## **Construction of Supramolecular-Polymer Hydrogel Electrolyte with Ionic Channels for Flexible Supercapacitors**

Kun-Peng Wang<sup>a</sup>, Ye Yang<sup>a</sup>, Qi Zhang<sup>\*a</sup>, Zhenyu Xiao<sup>a</sup>, Lingbo Zong<sup>a</sup>, Tetsu

Ichitsubo<sup>b</sup> and Lei Wang<sup>\*a</sup>

*<sup>a</sup> State Key Laboratory Base of Eco-Chemical Engineering, Taishan Scholar  
Advantage and Characteristic Discipline Team of Eco Chemical Process and  
Technology, College of Chemistry and Molecular Engineering, Qingdao University of  
Science and Technology, Qingdao 266042, China.*

*E-mail: [zhangqi@qust.edu.cn](mailto:zhangqi@qust.edu.cn) (Qi Zhang), [inorchemwl@126.com](mailto:inorchemwl@126.com) (Lei Wang).*

*<sup>b</sup> Institute for Materials Research, Tohoku University Collaborative Research Center  
on Energy Materials, 2-1-1 Katahira, Aoba-ku, Sendai 980-8577, Japan.*

## **Experimental**

### **Materials**

All the following chemical reagents were used without further purification. Poly (vinyl Alcohol) ( $n$ =approx. 1700 degree of saponification 97.0 to 100.0 mol % Aladdin Co., Japan), 2-Amino-9-beta-D-ribofuranosyl-9H-purine-6-(1H)-one hydrate (guanosine, Energy Chemical Co., China), KOH (Sinopharm Chemical Reagent Co., China),  $H_3BO_3$  (Tianjin Beichen Fangzheng Chemical Reagent Factory Co., China), AC (Activated carbon, Nanjing XFNANO Co., China), PTFE (polytetrafluoroethylene D210C DAIKIN Co., Japan).

### **Preparation of original PVA gel and PVA-GB gel**

Typically, the PVA hydrogel was prepared by dissolving 0.15 g PVA into 3 mL distilled water with stirring at 90 °C to form a clear solution. After cool the solution to room temperature, 1 mL KOH (10.7 M) solution was added to the solution drop by drop under stirring. The mixture was placed at room temperature for 72 h to form the original PVA hydrogel.

For the PVA-GB hydrogel, firstly, a certain quality of guanosine (0, 56, 112, 168 mg) and an appropriate amount of KOH (0.6 mM) and  $H_3BO_3$  (1.9 mM) was dissolved in 4 mL deionized water. The mixture was ultrasound 30 s and heated to 90 °C to form a transparent solution. Then, mixing the hot solution with the above fresh PVA solution quickly to form a homogeneous mixture. Pour the mixed solution into a PTFE mold and let it polymerize spontaneously at room temperature for 24 hours to get the PVA-GB hydrogel.

### **Construction of all-solid-state SCs device**

For the construction of the symmetric quasi-solid-state SCs device, active carbon (AC) serves as the positive and negative electrodes. The AC electrode material was prepared by mixing AC (80 mg, 80 wt%), carbon black (10 mg, 10 wt%), PTFE (10 mg, 10 wt%) and a few drops of ethanol to form a mixture slurry. Then, the as-prepared slurry was dried at 70 °C under vacuum for 12 h to remove the solvent. Finally, the dried slurry was pressed on NF with a mass loading of 2 mg. The device was assembled by employing the PVA-GB gel as electrolyte and separator between two AC electrodes

to form a sandwich structure.

### **Characterizations**

Fourier transform infrared spectroscopy (FTIR) tests were performed on a Thermo Scientific Nicolet IS 50 spectrometer in the wavelength range of 4000-400  $\text{cm}^{-1}$ . The crystalline structures were analyzed by X-ray diffraction patterns (XRD, Rigaku Dmaxrc diffractometer with Cu K $\alpha$  radiation at  $\lambda = 1.541 \text{ \AA}$ ). The water content of the samples were examined using Thermogravimetric Analyzer (TG 209 F3, Netzsch). The Morphologies of samples were studied by scanning electron microscopy (SEM, Hitachi S-4800). All the electrochemical measurements were carried out at room temperature on a CHI760E electrochemical working station (Chenhua, Shanghai). LAND cyler (Land Electronic, Wuhan) was employed for electrochemical tests. Then the specific capacitance (C and C<sub>s</sub>, F  $\text{g}^{-1}$ ), energy density (E, Wh  $\text{kg}^{-1}$ ) and power density (P, W  $\text{kg}^{-1}$ ), were according to the following equation.

$$C = \frac{I \times \Delta t}{\Delta V}$$

$$C_s = 4 \times C$$

$$E = \frac{C \times \Delta V^2}{7.2}$$

$$P = \frac{3600 \times E}{\Delta t}$$

Table S1. The  $\sigma$  of other previous reports based on hydrogel electrolyte

| Electrolytes                                   | Ionic conductivity/<br>$\text{mS} \cdot \text{cm}^{-1}$ | References |
|------------------------------------------------|---------------------------------------------------------|------------|
| PVA/CH <sub>3</sub> COONH <sub>4</sub> /BmImBr | $9.29 \pm 0.1$                                          | 1          |
| PVAG1.0N0.8                                    | 62.26                                                   | 2          |
| PVA-g-PAA/KCl                                  | 41                                                      | 3          |
| PVA-BMIMCl-Li <sub>2</sub> SO <sub>4</sub>     | 37                                                      | 4          |
| B-PVA/KCl/GO                                   | 47.5                                                    | 5          |
| PPDE-LiCl-EV                                   | 20                                                      | 6          |
| AG/PAAm/LiCl                                   | $13 \pm 0.8$                                            | 7          |
| PVA-H <sub>2</sub> SO <sub>4</sub> -ARS        | 33.3                                                    | 8          |
| PVDF-HFP/IL/DPA/KI                             | 4.52                                                    | 9          |
| PKF4                                           | 45.56                                                   | 10         |
| PVA-LiClO <sub>4</sub>                         | 31.3                                                    | 11         |
| PVA-H <sub>2</sub> SO <sub>4</sub> -IC         | 20.07                                                   | 12         |
| HA-GPE                                         | 74.1                                                    | 13         |
| PVA-Li <sub>2</sub> SO <sub>4</sub> -BMIMCl    | 46                                                      | 14         |
| PVA-GB                                         | 70                                                      | This work  |

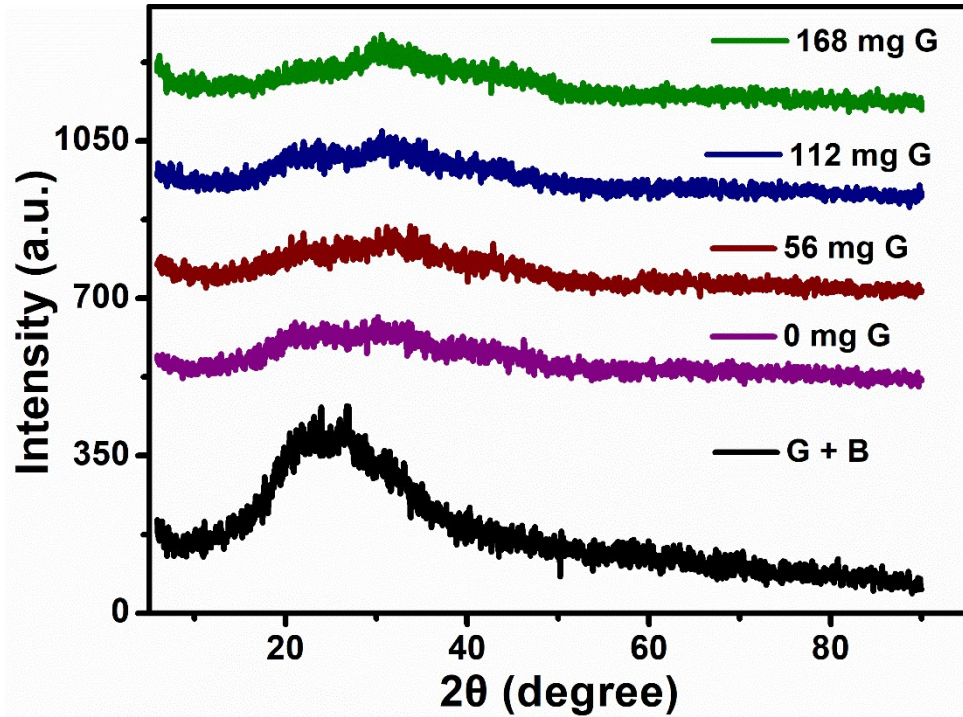

Figure S1. The XRD patterns of PVA-GB hydrogel with different contents G.

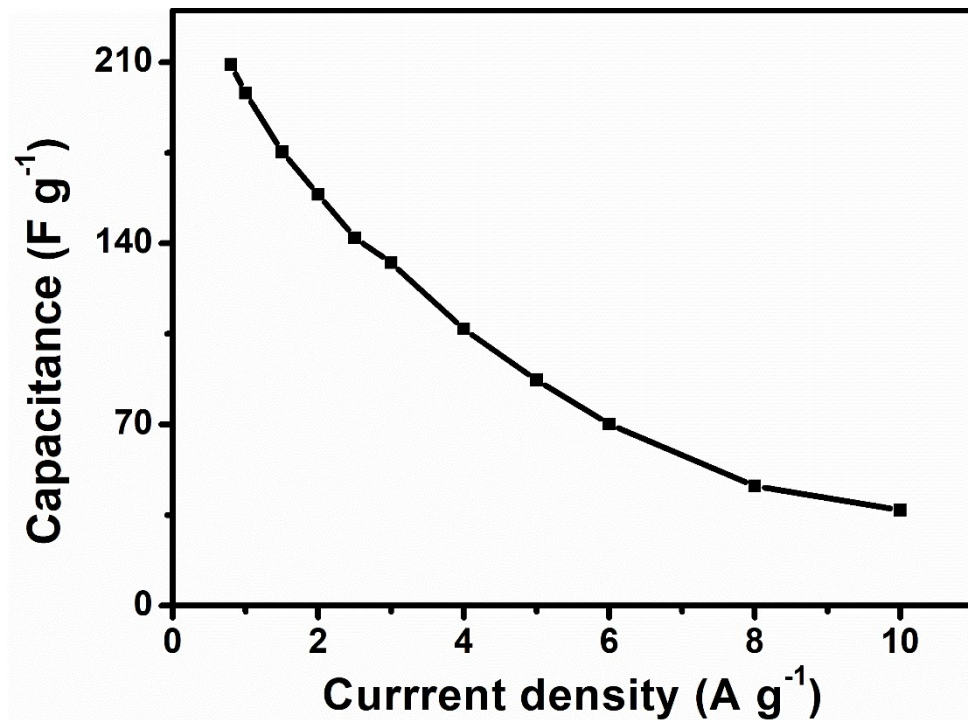

Figure S2. The rate performance of the device with PVA-GB (112 mg G) as the electrolyte at a wide range of current densities.

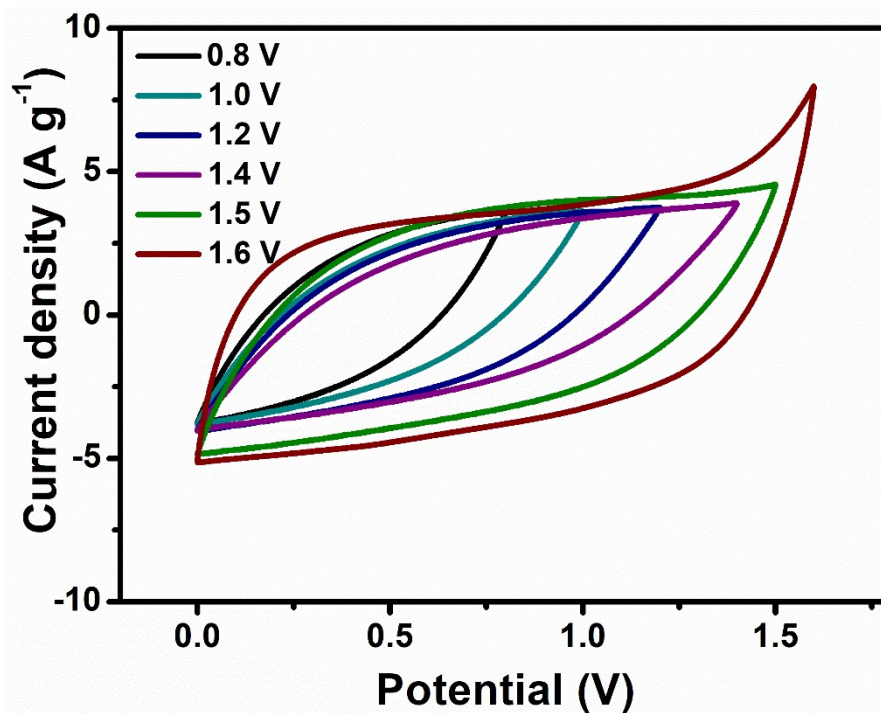

Figure S3. The CV curves at  $100 \text{ mV s}^{-1}$  with different voltage ranges from  $0 \sim 0.8 \text{ V}$  to  $0 \sim 1.6 \text{ V}$ .

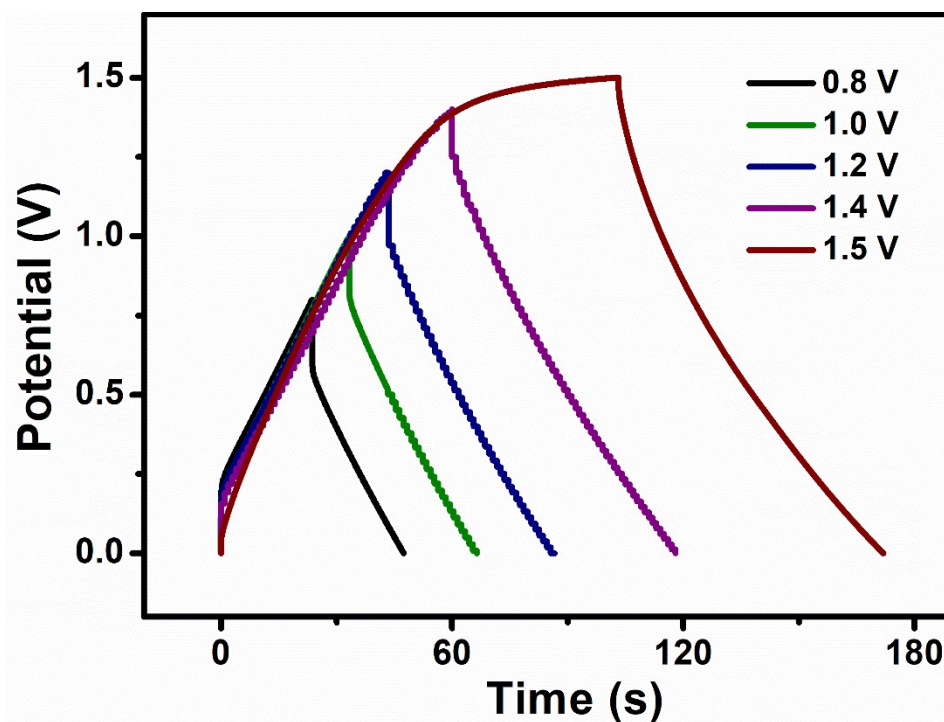

Figure S4. The GCD curves with different voltage ranges at  $1 \text{ A g}^{-1}$ .

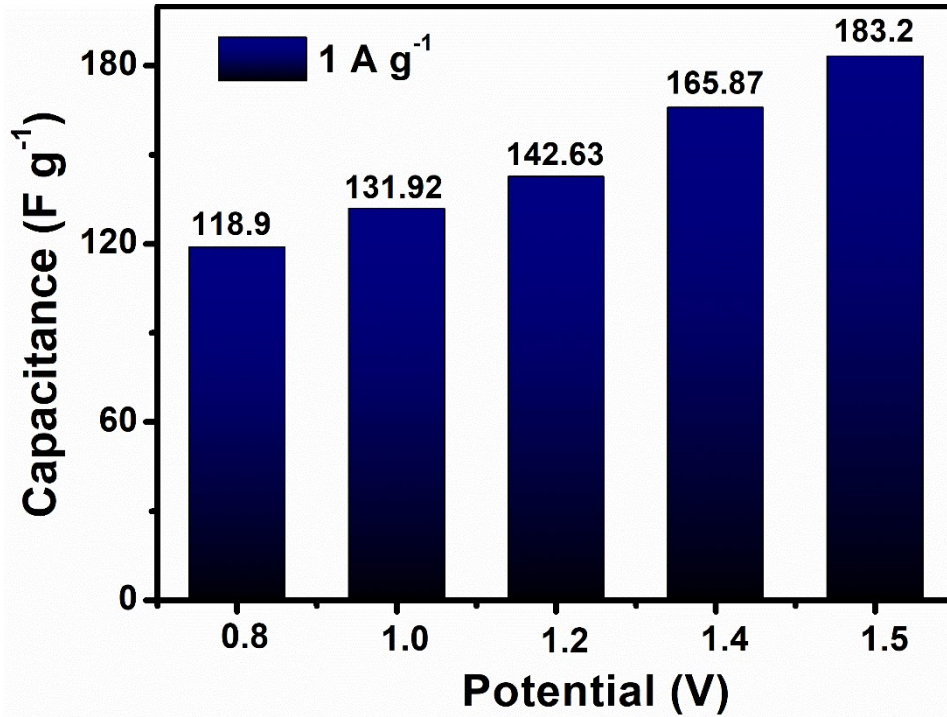

Figure S5. The specific capacitance of the device with different voltage ranges at 1 A g<sup>-1</sup>: 0 ~ 0.8 V, 0 ~ 1.0 V, 0 ~ 1.2 V, 0 ~ 1.4 V and 0 ~ 1.5 V.

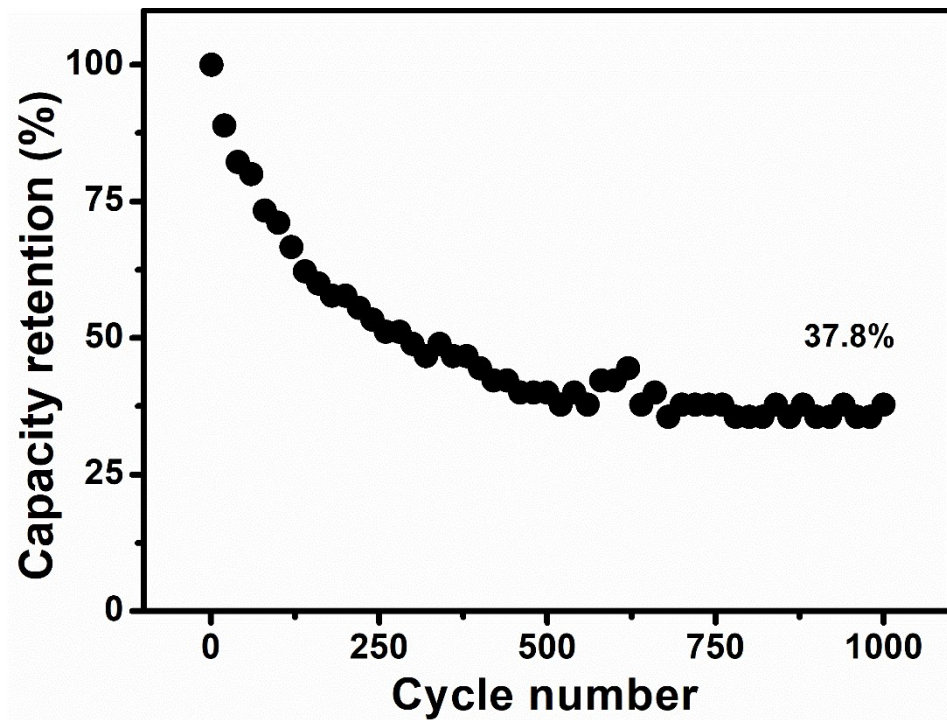

Figure S6. the cycle stability of the PVA hydrogel electrolyte-based device

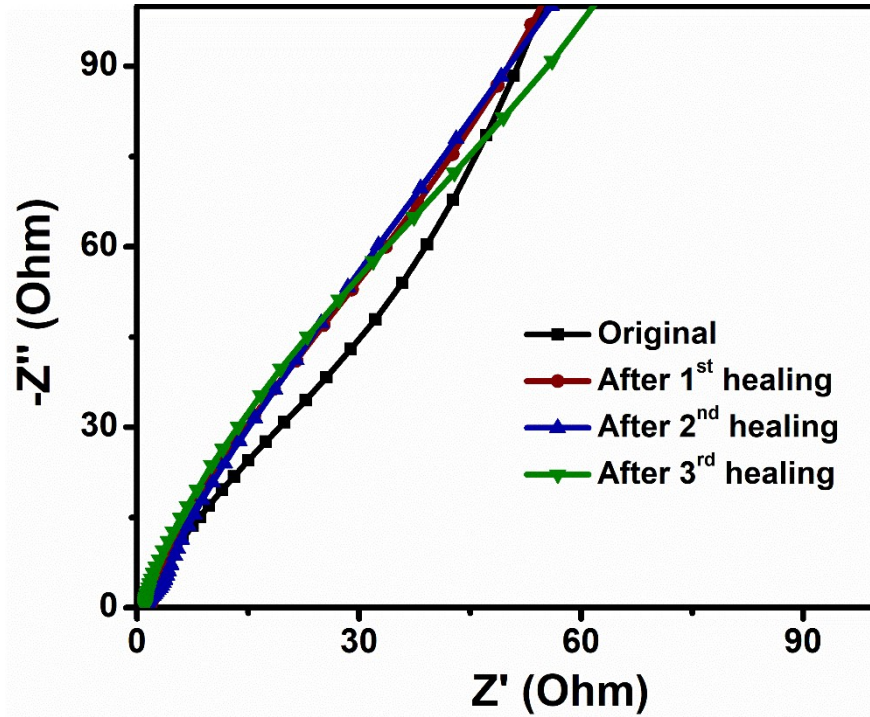

Figure S7. The Nyquist plots after different cut-healing cycles.

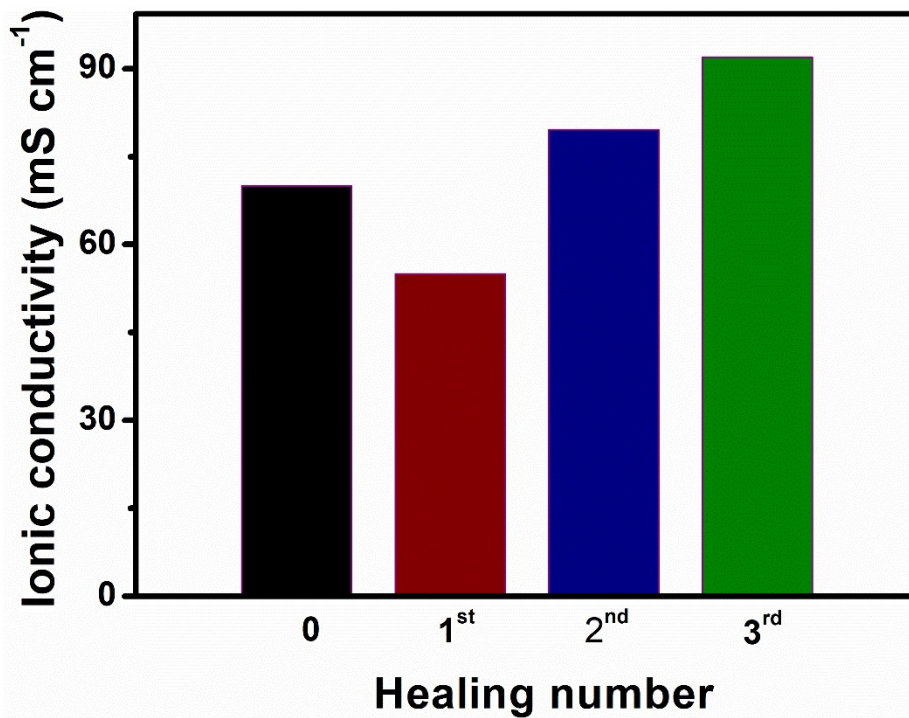

Figure S8. The ionic conductivity after different cut-healing cycles.



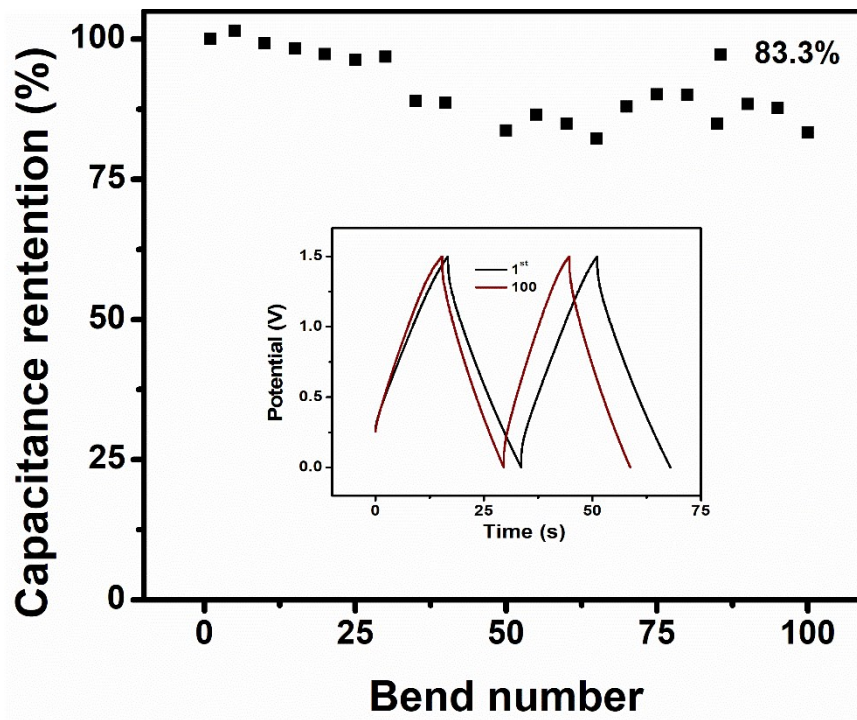

Figure S9. The capacitance retention of the device after different bending times.

## Supporting References

- 1 C. W. Liew, S. Ramesh and A. K. Arof, Characterization of ionic liquid added PVA-based proton conducting polymer electrolytes and electrochemical studies on the supercapacitors, *International Journal of Hydrogen Energy*, 2015, **40**, 852–862.
- 2 S. Peng, X. Jiang, X. Xiang, K. Chen, G. Chen, X. Jiang and L. Hou, High-performance and flexible solid-state supercapacitors based on high toughness and thermoplastic PVAGN supramolecular gel polymer electrolyte, *Electrochim. Acta*, 2019, **24**, 134874.
- 3 Z. Wang, F. Tao and Q. Pan, A self-healable polyvinyl alcohol-based hydrogel electrolyte for smart electrochemical capacitors, *J. Mater. Chem. A*, 2016, **4**, 17732–17739.
- 4 X. Zhang, L. Wang, J. Peng, P. Cao, X. Cai, J. Li and M. Zhai, A flexible ionic liquid gelled PVA-Li<sub>2</sub>SO<sub>4</sub> polymer electrolyte for semi-solid-state supercapacitors, *Adv. Mater. Interface*, 2015, **2**, 1500267.
- 5 H. Peng, Y. Lv, G. Wei, J. Zhou, X. Gao, K. Sun, G. Ma and Z. Lei, A flexible and self-healing hydrogel electrolyte for smart supercapacitor, *J. Power Sources*, 2019, **431**, 210–219.
- 6 S. E. Hyeon, J. Y. Seo, J. W. Bae, W. J. Kim and C. H. Chung, Faradaic reaction of dual-redox additive in zwitterionic gel electrolyte boosts the performance of flexible supercapacitors, *Electrochim. Acta*, 2019, **319**, 672–681.

7 L. Feng, Z. Cai, Z. Ding, T. Chen, J. Zhang, F. Chen, J. Shen, F. Chen, R. Li, X. Zhou and Z. Xie, Skin-inspired surface-microstructured tough hydrogel electrolyte for stretchable supercapacitors, *ACS Appl. Mater. Interfaces*, 2019, **11**, 21895–21903.

8 K. Sun, F. Ran, G. Zhao, Y. Zhu, Y. Zheng, M. Ma, X. Zheng, G. Ma and Z. Lei, High energy density of quasi-solid-state supercapacitor based on redox-mediated gel polymer electrolyte, *RSC Adv.*, 2016, **6**, 55225–55232.

9 N. Yadav and S. A. Hashmi, Energy enhancement of quasi-solid-state supercapacitor based on non-aqueous gel polymer electrolyte via synergistic effect of dual redox-additives diphenyl amine and potassium iodide, *J. Mater. Chem. A*, 2020, **8**, 18266–18279.

10 G. Ma, J. Li, K. Sun, H. Peng, J. Mu and Z. Lei, High performance solid-state supercapacitor with PVA-KOH-K<sub>3</sub>[Fe (CN)<sub>6</sub>] gel polymer as electrolyte and separator, *J. Power Sources*, 2014, **256**, 281-287.

11 P. A. Le, V. T. Nguyen, P. J. Yen, T. Y. Tseng and K. H. Wei, A new redox phloroglucinol additive incorporated gel polymer electrolyte for flexible symmetrical solid-state supercapacitors, *Sustainable Energy & Fuels*, 2019, **3**, 1536–1544.

12 G. Ma, M. Dong, K. Sun, E. Feng, H. Peng and Z. Lei, A redox mediator doped gel polymer as an electrolyte and separator for a high performance solid state supercapacitor, *J. Mater. Chem. A*, 2015, **3**, 4035–4041.

- 13 R. Na, Y. Liu, N. Lu, S. Zhang, F. Liu and G. Wang, Mechanically robust hydrophobic association hydrogel electrolyte with efficient ionic transport for flexible supercapacitors, *Chem. Eng. J.*, 2019, **374**, 738–747.
- 14 Q. Tu, L. Fan, F. Pan, J. Huang, Y. Gu, J. Lin, M. Huang, Y. Huang and J. Wu, Design of a novel redox-active gel polymer electrolyte with a dual-role ionic liquid for flexible supercapacitors, *Electrochim. Acta*, 2018, **268**, 562–568.
